# Supplementary material
Source: MDPI journal article supplement (https://www.mdpi.com/1424-2818/13/9/447)
Supplement: s1 [file s1]

## Assessing ecological indicators for remnant vegetation strips as functional biological corridors in Chilean vineyards

Javiera Díaz-Forestier, Sebastián Abades, Nélida Pohl, Olga Barbosa, Karina Godoy, Gabriella L. Svensson, María I. Undurraga, Camila Bravo, Camila García, Meredith Root-Bernstein, Juan J. Armesto and Juan L. Celis-Diez

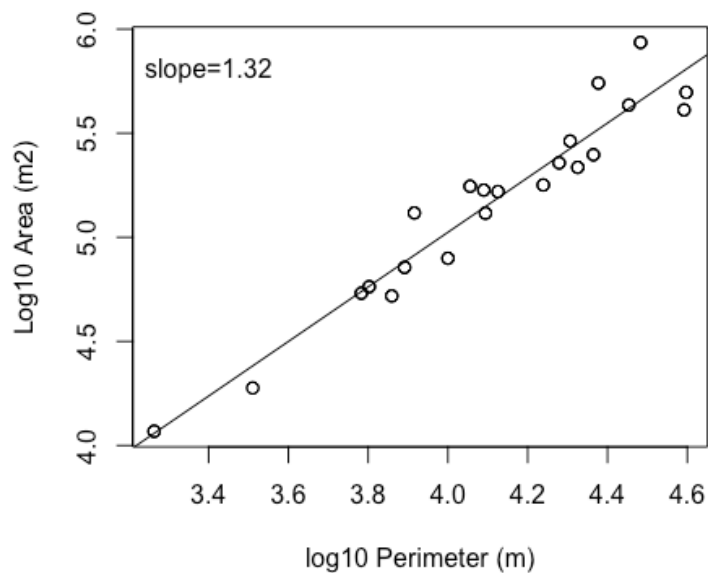

**Figure S1.** Relation in log scale between corridor area (m<sup>2</sup>) and perimeter (m).

**Table S1.** Description and characteristic of vegetation strips or corridor in the studied vineyards

| Vineyard | Type of corridors                                              | Corridors in vineyard     |                               |                          |        | Sampled corridor                                                      |                                                                     |            |
|----------|----------------------------------------------------------------|---------------------------|-------------------------------|--------------------------|--------|-----------------------------------------------------------------------|---------------------------------------------------------------------|------------|
|          |                                                                | total corridors area (ha) | cultivated area/corridor area | corridors perimeter/area | Length | number of branches connecting the vegetation strip to "natural areas" | number of branches connecting to natural areas over corridor length | mean width |
| 1        | natural corridors in streams with native vegetation            | 86,3                      | 3                             | 352,5                    | 1.085  | 6                                                                     | 180,8                                                               | 20         |
| 2        | natural corridors in streams with native vegetation            | 55                        | 8,3                           | 433,2                    | 5.000  | 3                                                                     | 1.666,70                                                            | 95,00      |
| 3        | natural corridors in streams with native and exotic vegetation | 13,1                      | 11,1                          | 628,7                    | 1.225  | 4                                                                     | 306,3                                                               | 44,6       |
| 4        | natural corridors in streams with native and exotic vegetation | 17,6                      | 6,1                           | 645,7                    | 1.900  | 1                                                                     | 1.900,00                                                            | 23,50      |
| 5        | natural corridors in streams with native vegetation            | 43,2                      | 4,6                           | 658                      | 2.090  | 5                                                                     | 418                                                                 | 24,6       |
| 6        | natural corridors in streams with native and exotic vegetation | 29                        | 12,4                          | 698                      | 3.900  | 2                                                                     | 1.950,00                                                            | 31,00      |
| 7        | natural corridors in streams with native vegetation            | 16,9                      | 8,5                           | 729,4                    | 1.635  | 7                                                                     | 233,6                                                               | 25         |
| 8        | natural corridors in streams with native vegetation            | 49,7                      | 8,2                           | 796,4                    | 4.435  | 12                                                                    | 369,6                                                               | 18,8       |
| 9        | natural corridors in streams with native and exotic vegetation | 16,6                      | 10,5                          | 805                      | 2.175  | 13                                                                    | 167,3                                                               | 16,8       |

|    |                                                                                                       |      |      |          |       |    |          |       |
|----|-------------------------------------------------------------------------------------------------------|------|------|----------|-------|----|----------|-------|
| 10 | natural corridors in streams with native and exotic vegetation                                        | 22,8 | 8,4  | 834,6    | 1.808 | 1  | 1.808,00 | 28,60 |
| 11 | natural corridors in streams and roadside plantings with native and exotic vegetation                 | 24,9 | 25,7 | 929,7    | 880   | 11 | 80       | 18,3  |
| 12 | natural corridors in streams with native vegetation                                                   | 13,1 | 6,5  | 950,8    | 840   | 2  | 420      | 43,3  |
| 13 | natural corridors in streams and planted along canal and crop edges with native and exotic vegetation | 40,9 | 15,4 | 955,3    | 2.745 | 3  | 915      | 23,3  |
| 14 | natural corridors in streams and planted along canal and crop edges with native and exotic vegetation | 17,8 | 8,9  | 971,7    | 1.162 | 1  | 1.162,00 | 22,16 |
| 15 | natural corridors in streams and planted corridors, with native and exotic vegetation                 | 21,7 | 6,2  | 975,9    | 1.955 | 4  | 488,8    | 27    |
| 16 | channel edge with native and exotic vegetation                                                        | 7,2  | 13,6 | 1.085,90 | 2.115 | 6  | 352,5    | 18,3  |
| 17 | natural corridors in streams with native and exotic vegetation                                        | 5,8  | 9,9  | 1.096,30 | 1.473 | 3  | 491      | 16,16 |
| 18 | natural corridors in streams with native and exotic vegetation                                        | 5,4  | 13   | 1.125,40 | 970   | 6  | 161,7    | 13    |
| 19 | natural corridors in streams and canal edge with native and exotic vegetation.                        | 7,9  | 15,6 | 1.261,20 | 380   | 6  | 63,3     | 10,5  |
| 20 | natural corridors in streams with native vegetation                                                   | 5,2  | 20,8 | 1.382,50 | 550   | 2  | 275      | 11,6  |
| 21 | part of natural slopes with native vegetation                                                         | 1,2  | 25,9 | 1.567,20 | 490   | 14 | 35       | 24,6  |
| 22 | planted along canal and road sides with exotic vegetation                                             | 1,9  | 78,6 | 1.714,60 | 665   | 2  | 332,5    | 17    |

---

**Table S2.** Effects of corridor versus natural area on ecological indicators. Model for birds and woody plant coverage are zero-inflated. Parameter estimates are incidence ratios or odds ratio depending on the distributional assumption (Poisson and Binomal) and represents a difference between the corridor and natural area treatments.

|                     | Bird species                 |                   |          | Tree regeneration        |                   |          | Geophytes                |                   |          | Woody plant coverage     |                   |          |
|---------------------|------------------------------|-------------------|----------|--------------------------|-------------------|----------|--------------------------|-------------------|----------|--------------------------|-------------------|----------|
| <i>Predictor</i>    | <i>Incidence Rate Ratios</i> | <i>std. Error</i> | <i>p</i> | <i>Odds Ratios</i>       | <i>std. Error</i> | <i>p</i> | <i>Odds Ratios</i>       | <i>std. Error</i> | <i>p</i> | <i>Odds Ratios</i>       | <i>std. Error</i> | <i>p</i> |
| Corridor            | -0.94                        | 0.237             | <0.001   | 0.55                     | 0.386             | 0.149    | -0.98                    | 0.493             | 0.045    | -0.36                    | 0.358             | 0.304    |
| Zero-Inflated Model |                              |                   |          |                          |                   |          |                          |                   |          |                          |                   |          |
| Corridor            | -1.98                        | 46119.32          | 1.000    |                          |                   |          |                          |                   |          | -3.49                    | 57254.04          | 1.000    |
| Random Effects      |                              |                   |          |                          |                   |          |                          |                   |          |                          |                   |          |
| $\sigma^2$          | 0.68                         |                   |          | 3.29                     |                   |          | 3.29                     |                   |          | 3.29                     |                   |          |
| $\tau_{00}$         | 0.05 <small>VINA</small>     |                   |          | 0.70 <small>VINA</small> |                   |          | 2.94 <small>VINA</small> |                   |          | 0.00 <small>VINA</small> |                   |          |
| Observations        | 128                          |                   |          | 128                      |                   |          | 128                      |                   |          | 128                      |                   |          |

**Table S3.** Parameter estimates for corridor attributes obtained after applying the model selection routine to each ecological indicator. Estimates are incidence ratios or odds ratio depending on the distributional assumption of the model (Poisson and Binomal).

| Predictors               | Bird species                 |                   |             | Tree regeneration        |                   |              | Geophytes                     |                   |                  | Woody plant coverage     |                   |          |
|--------------------------|------------------------------|-------------------|-------------|--------------------------|-------------------|--------------|-------------------------------|-------------------|------------------|--------------------------|-------------------|----------|
|                          | <i>Incidence Rate Ratios</i> | <i>std. Error</i> | <i>p</i>    | <i>Odds Ratios</i>       | <i>std. Error</i> | <i>p</i>     | <i>Odds Ratios</i>            | <i>std. Error</i> | <i>p</i>         | <i>Odds Ratios</i>       | <i>std. Error</i> | <i>p</i> |
| Distance to natural area | -0.00127                     | 0.00              | <b>0.05</b> |                          |                   |              | -0.344                        | 0.0854            | <b>&lt;0.001</b> | -0.0015                  | 0.0008            | 0.077    |
| Corridor area            |                              |                   |             | -0.094                   | 0.0457            | <b>0.038</b> | 5.621                         | 1.522             | <b>&lt;0.001</b> |                          |                   |          |
| Corridor length          |                              |                   |             | -0.001                   | 0.0005            | 0.059        | -0.037                        | 0.010             | <b>&lt;0.001</b> |                          |                   |          |
| Corridor perimeter/area  |                              |                   |             | -0.008                   | 0.0036            | <b>0.019</b> |                               |                   |                  | -0.0023                  | 0.0012            | 0.054    |
| Crop/corridor area       |                              |                   |             |                          |                   |              | -5.77                         | 1.415             | <b>&lt;0.001</b> |                          |                   |          |
| <b>Random Effects</b>    |                              |                   |             |                          |                   |              |                               |                   |                  |                          |                   |          |
| $\sigma^2$               | 1.26                         |                   |             | 3.29                     |                   |              | 3.29                          |                   |                  | 3.29                     |                   |          |
| $\tau_{00}$              | 0.00 <small>VINA</small>     |                   |             | 2.13 <small>VINA</small> |                   |              | 415827.57 <small>VINA</small> |                   |                  | 0.09 <small>VINA</small> |                   |          |
| Observations             | 63                           |                   |             | 63                       |                   |              | 63                            |                   |                  | 63                       |                   |          |
